# Supplementary material for: Auto- and cross-regulation of the hnRNPs D and DL
Source: PubMed Central journal article supplement — RNA. 2018 Mar;24(3):324–31. doi: 10.1261/rna.063420.117 (PMC5824352; doi:10.1261/rna.063420.117), 2018-03
Supplement: supp_063420.117_Supplemental_Figure_S1.pdf [file supp_063420.117_Supplemental_Figure_S1.pdf]

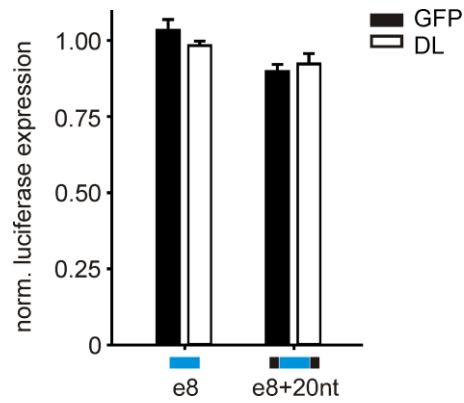

**Figure S1. *HnRNP DL* exon 8 alone does not influence luciferase expression.** Luciferase activity of e8 (*hnRNP DL* exon 8) and e8+20nt (*hnRNP DL* exon 8 plus 20 nt of the flanking exons 7 and 9) after overexpression of *hnRNP DL* (DL) or GFP (GFP) as a control. Firefly luciferase activity was normalized to *Renilla* luciferase as an internal control. Values are normalized to an empty vector control, without *hnRNP DL* 3'UTR sequences. n = 3.
