# Supplementary material for: Auto- and cross-regulation of the hnRNPs D and DL
Source: PubMed Central journal article supplement — RNA. 2018 Mar;24(3):324–31. doi: 10.1261/rna.063420.117 (PMC5824352; doi:10.1261/rna.063420.117), 2018-03
Supplement: supp_063420.117_Supplemental_Figure_S2.pdf [file supp_063420.117_Supplemental_Figure_S2.pdf]

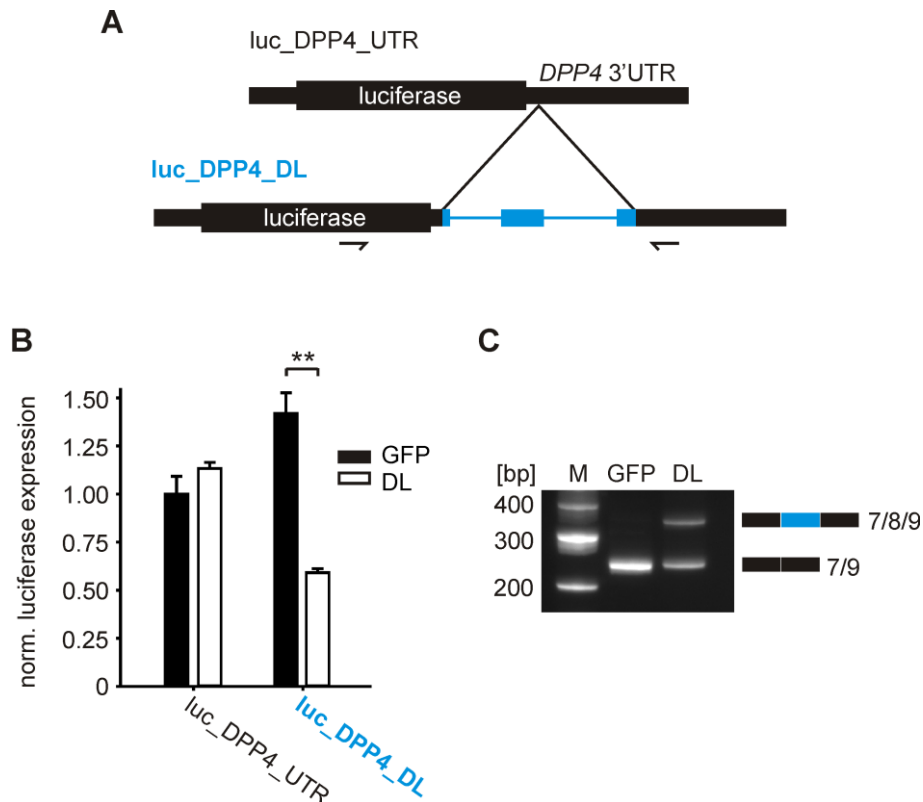

**Figure S2. Alternative splicing of *hnRNP DL* exon 8 is sufficient to trigger NMD in an unrelated transcript.** **A)** Scheme of the *DPP4* luciferase constructs. The entire 3'UTR of *DPP4* was fused to the *luc2* gene in a dual luciferase vector (Luc\_DPP4\_UTR). For *hnRNP DL*-dependent regulation, exon 8 along with flanking sequences (intron 7 and 8 and parts of exon 7 and 9) were inserted into the *DPP4* 3'UTR (Luc\_DPP4\_DL). The introduced *hnRNP DL* 3'UTR sequences are indicated in blue. Boxes indicate exonic sequences, lines indicate intronic sequences. Arrows indicate the location of oligonucleotides used for RT-PCR in **C**. **B)** Luciferase activity of Luc\_DPP4\_UTR and Luc\_DPP4\_DL after overexpression of *hnRNP DL* (DL) or GFP (GFP) as a control. Firefly luciferase activity was normalized to *Renilla* luciferase as an internal control. Values of Luc\_DPP4\_UTR with GFP were set to 1.  $n = 3$ , \*\* =  $p$ -value  $< 0.01$ . **C)** RT-PCR of Luc\_DPP4\_DL after overexpression of *hnRNP DL* (DL) or GFP as control (GFP). The short isoform 7/9 corresponds to the exon 8 exclusion isoform, the long isoform 7/8/9 to exon 8 inclusion.  $n = 2$ .
