# Supplementary material for: Auto- and cross-regulation of the hnRNPs D and DL
Source: PubMed Central journal article supplement — RNA. 2018 Mar;24(3):324–31. doi: 10.1261/rna.063420.117 (PMC5824352; doi:10.1261/rna.063420.117), 2018-03
Supplement: supp_063420.117_Supplemental_Figure_S3.pdf [file supp_063420.117_Supplemental_Figure_S3.pdf]

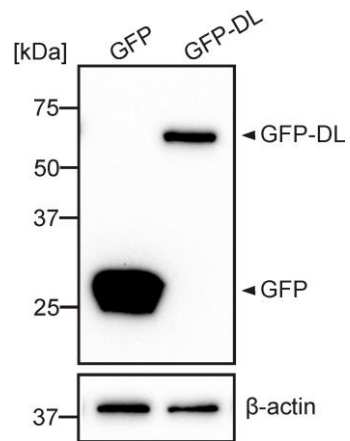

**Figure S3. Chromosomal integration of a GFP-hnRNP DL fusion protein.** Western Blot to verify the expression of an integrated GFP-hnRNP DL fusion protein. Anti-GFP was used to simultaneously detect GFP-hnRNP DL (GFP-DL) and GFP in a control cell line. Anti- $\beta$ -actin was used as a loading control.  $n = 3$ .
