# Supplementary material for: Auto- and cross-regulation of the hnRNPs D and DL
Source: PubMed Central journal article supplement — RNA. 2018 Mar;24(3):324–31. doi: 10.1261/rna.063420.117 (PMC5824352; doi:10.1261/rna.063420.117), 2018-03
Supplement: supp_063420.117_Supplemental_Figure_S4.pdf [file supp_063420.117_Supplemental_Figure_S4.pdf]

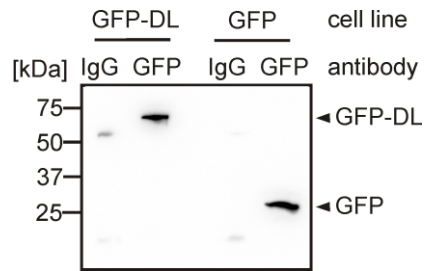

**Figure S4. Immunoprecipitation of GFP-hnRNP DL and GFP.** Western Blot to verify a comparable pulldown efficiency of GFP-hnRNP DL fusion protein and GFP. Anti-GFP was used to simultaneously detect GFP-hnRNP DL (GFP-DL) and GFP. Mouse IgG (IgG) was used as negative control. n = 6.
