# Supplementary material for: Auto- and cross-regulation of the hnRNPs D and DL
Source: PubMed Central journal article supplement — RNA. 2018 Mar;24(3):324–31. doi: 10.1261/rna.063420.117 (PMC5824352; doi:10.1261/rna.063420.117), 2018-03
Supplement: supp_063420.117_Supplemental_Figure_S5.pdf [file supp_063420.117_Supplemental_Figure_S5.pdf]

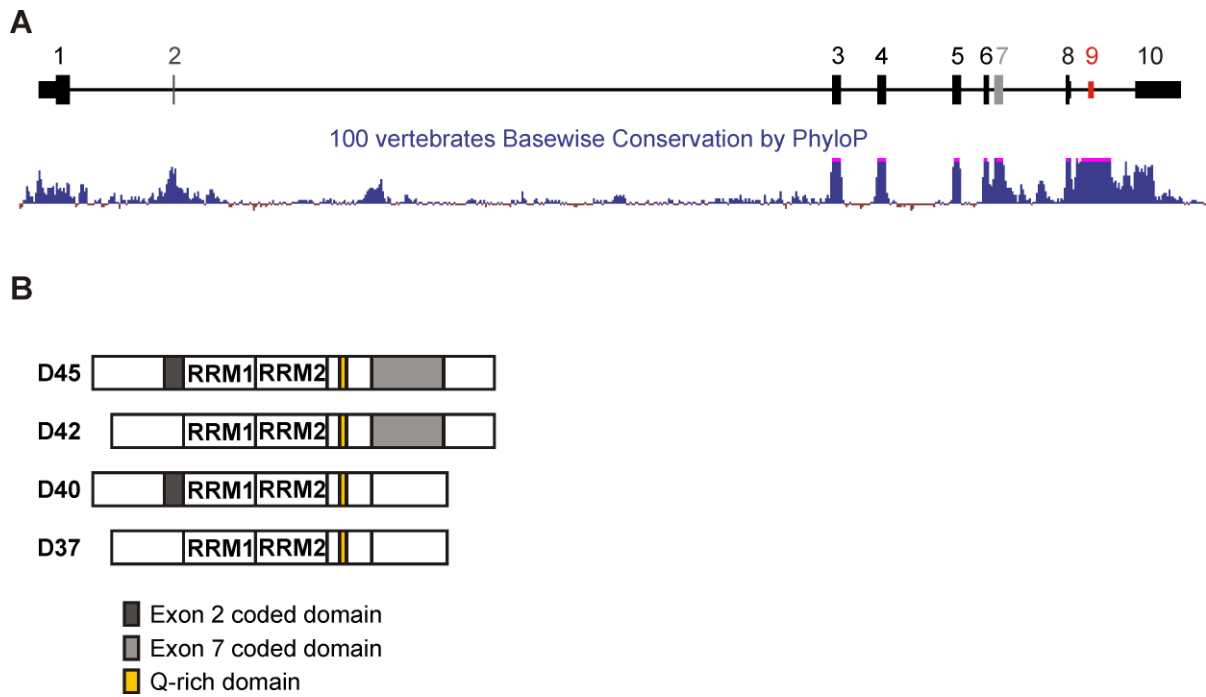

**Figure S5. Alternatively spliced exons in the *hnRNP D* gene. A)** Exon cluster of the *hnRNP D* gene. Constitutive exons are shown in black, the alternative exons 2 and 7 in grey, the poison exon 9 in red. Lines indicate introns, big boxes show coding exons, while smaller boxes show untranslated exons. **B)** Protein isoform produced by alternative splicing of the *hnRNP D* pre-mRNA. Isoforms are named according to their apparent molecular weight.
