# Supplementary material for: Auto- and cross-regulation of the hnRNPs D and DL
Source: PubMed Central journal article supplement — RNA. 2018 Mar;24(3):324–31. doi: 10.1261/rna.063420.117 (PMC5824352; doi:10.1261/rna.063420.117), 2018-03
Supplement: supp_063420.117_Supplemental_Table_S1.pdf [file supp_063420.117_Supplemental_Table_S1.pdf]

**Table S1.** Oligonucleotide sequences used for RT-PCR and RT-qPCR analyses.

| <b>Specificity</b>              | <b>Figure</b>       | <b>fwd-primer<br/>5' → 3'</b> | <b>rev-primer<br/>5' → 3'</b>  | <b>Product<br/>size [bp]</b> |
|---------------------------------|---------------------|-------------------------------|--------------------------------|------------------------------|
| hnRNP DL exon 8<br>(endogenous) | Fig. 1B             | GTGGCTATGGCGG<br>ATATGAT      | TGTCGTCCTGCAAG<br>ATGG         | 313/208                      |
| hnRNP DL mRNA<br>(spliced)      | Fig. 3C             | AGATGCTGCTAGT<br>GTTGATAAG    | AGGTTCTTTCCCTT<br>TTAAAGC      | 103                          |
| hnRNP DL pre-mRNA_1             | Fig. 3C             | GCAAGGCATACAC<br>CAGAAAAC     | TGAGGCTCCACAA<br>TTGAAATAC     | 238                          |
| hnRNP DL pre-mRNA_2             | Fig. 3C             | ACTTGGGTTACTAG<br>AGATGCTTC   | TCACCCTGGAGTTC<br>CCAAATG      | 133                          |
| hnRNP DL short (7/9)            | Fig. 1C<br>and 3B   | AACATTGGAGAAA<br>ACAGGAGGAG   | TGGCAGCTATATAC<br>AGTTGGACA    | 149                          |
| hnRNP DL long (7/8/9)           | Fig. 1C<br>and 3B   | CGCTGTCCTGTGGA<br>GGAG        | TGGCAGCTATATAC<br>AGTTGGACA    | 144                          |
| Luciferase minigene<br>DPP4_DL  | Fig. S2             | GAGGTGCCTAAAG<br>GACTG        | GATCATCATCATCT<br>TGACAGTGC    | 238/343                      |
| Luciferase minigene<br>hnRNP DL | Fig. 2C<br>and 4C   | GAGGTGCCTAAAG<br>GACTG        | TGGCAGCTATATAC<br>AGTTGGACA    | 360/255                      |
| Luciferase minigene<br>hnRNP D  | Fig. 4C             | GAGGTGCCTAAAG<br>GACTG        | GGGAAAGGGCATA<br>AAACACA       | 464/357                      |
| RPLP0                           | Fig. 1B/C<br>and 3B | TCGACAATGGCAG<br>CATCTAC      | ATCCGTCTCCACAG<br>ACAAGG       | 191                          |
| U1 snRNA                        | Fig. 3C             | GGGAGATAACCATG<br>ATCACGAAGGT | CCACAAATTATGC<br>AGTCGAGTTTCCC | 118                          |
| UPF1                            | Fig. 1C             | CCTTCCCATCCAAC<br>ATCTTC      | AACATCGGTTTATC<br>GGTTG        | 112                          |
